# Supplementary material for: Determination of Carbonyl Compounds in Different Work Environments: Comparison between LC-UV/DAD and LC–MS/MS Detection Methods
Source: Int J Environ Res Public Health. 2022 Sep 23;19(19):12052. doi: 10.3390/ijerph191912052 (PMC9565147; doi:10.3390/ijerph191912052)
Supplement: Supplementary file 1 [file ijerph-19-12052-s001.zip › ijerph-1882102-supplementary.pdf]

# **Determination of Carbonyl Compounds in Different Work Environments: Comparison between LC-UV/DAD and LC-MS/MS Detection Methods**

Federica Castellani <sup>1,2</sup>, Arianna Antonucci <sup>1</sup>, Ivano Pindinello <sup>1</sup>, Carmela Protano <sup>1</sup>, Matteo Vitali <sup>1,\*</sup>

<sup>1</sup> Department of Public Health and Infectious Diseases, Sapienza University of Rome, P.le Aldo Moro, 5, 00185 Rome, Italy

<sup>2</sup> Department of Ecological and Biological Sciences, Tuscia University, Largo dell'Università snc, 01100 Viterbo, Italy

\*Correspondence: [matteo.vitali@uniroma1.it](mailto:matteo.vitali@uniroma1.it); Tel.: +39-0649914560

**S1. LC-UV/DAD chromatogram of blank cartridge**

**S2. LC-MS/MS chromatogram of aldehydes-DNPH standard solution**

**S3. LC-UV/DAD chromatogram of aldehydes-DNPH standard solution**

**S4. LC-MS/MS and LC-UV/DAD chromatograms of PL5-doc**

**S5. LC-MS/MS and LC-UV/DAD chromatograms of BS1-hair**

**S6. LC-MS/MS and LC-UV/DAD chromatograms of ParL4-lab**

**S7. Aldehyde concentrations in blank samples**

### S1. LC-UV/DAD chromatogram of blank cartridge

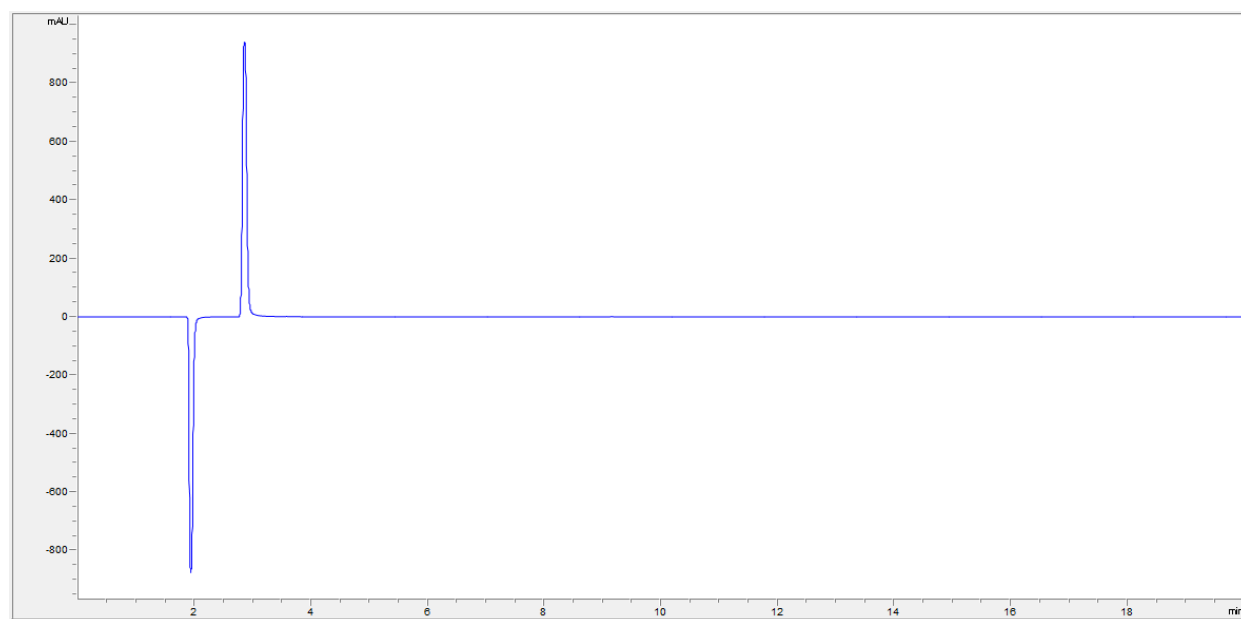

**Figure S1.** LC-UV/DAD chromatogram of blank cartridge. The peak at 3.85 min is the unreacted DNPH.

## S2. LC-MS/MS chromatogram of aldehydes-DNPH standard solution

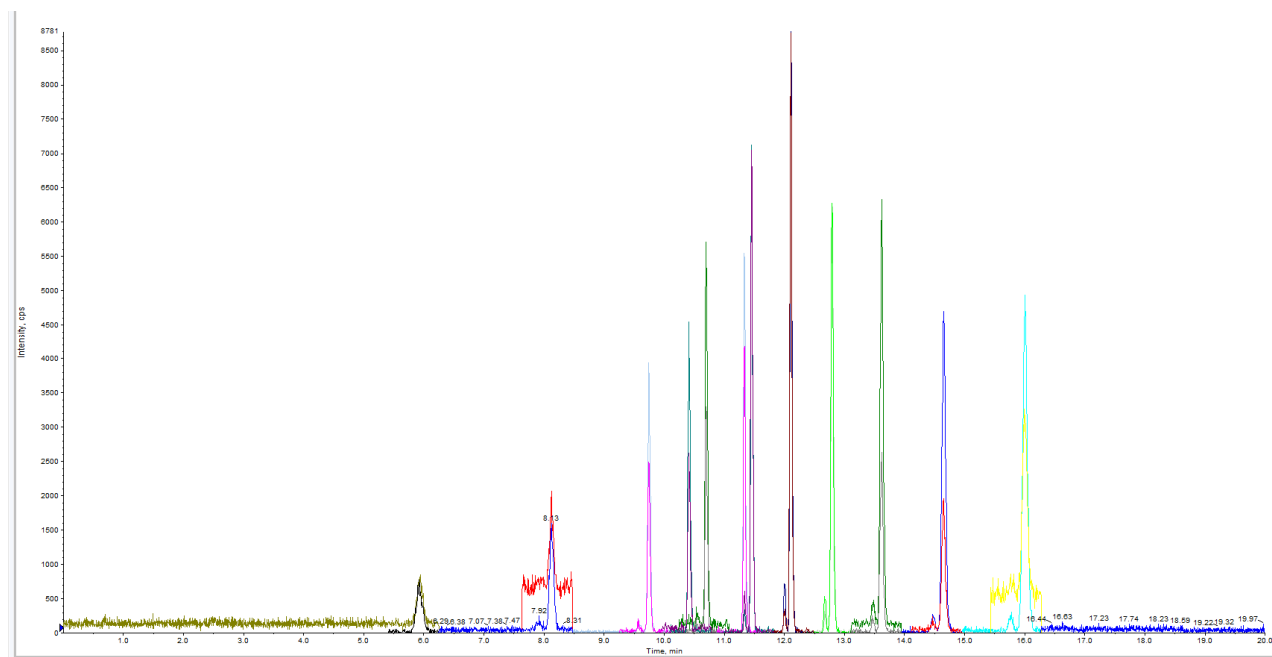

**Figure S2.** LC-MS/MS chromatogram obtained by injecting 5  $\mu\text{L}$  of aldehydes-DNPH standard solution at 0.2  $\mu\text{g L}^{-1}$ . Peaks identification: Fo-DNPH (5.83 min), Ace-DNPH (8.05 min), Pro-DNPH (9.68 min), Cro-DNPH (10.36 min), Bu-DNPH (10.65 min), Cy-DNPH (11.29 min), Val-DNPH (11.40 min), Hex-DNPH (12.06 min), Hep-DNPH (12.73 min), Oct-DNPH (13.53 min), Non-DNPH (14.53 min), Dec-DNPH (15.85 min).

### S3. LC-UV/DAD chromatogram of aldehydes-DNPH standard solution

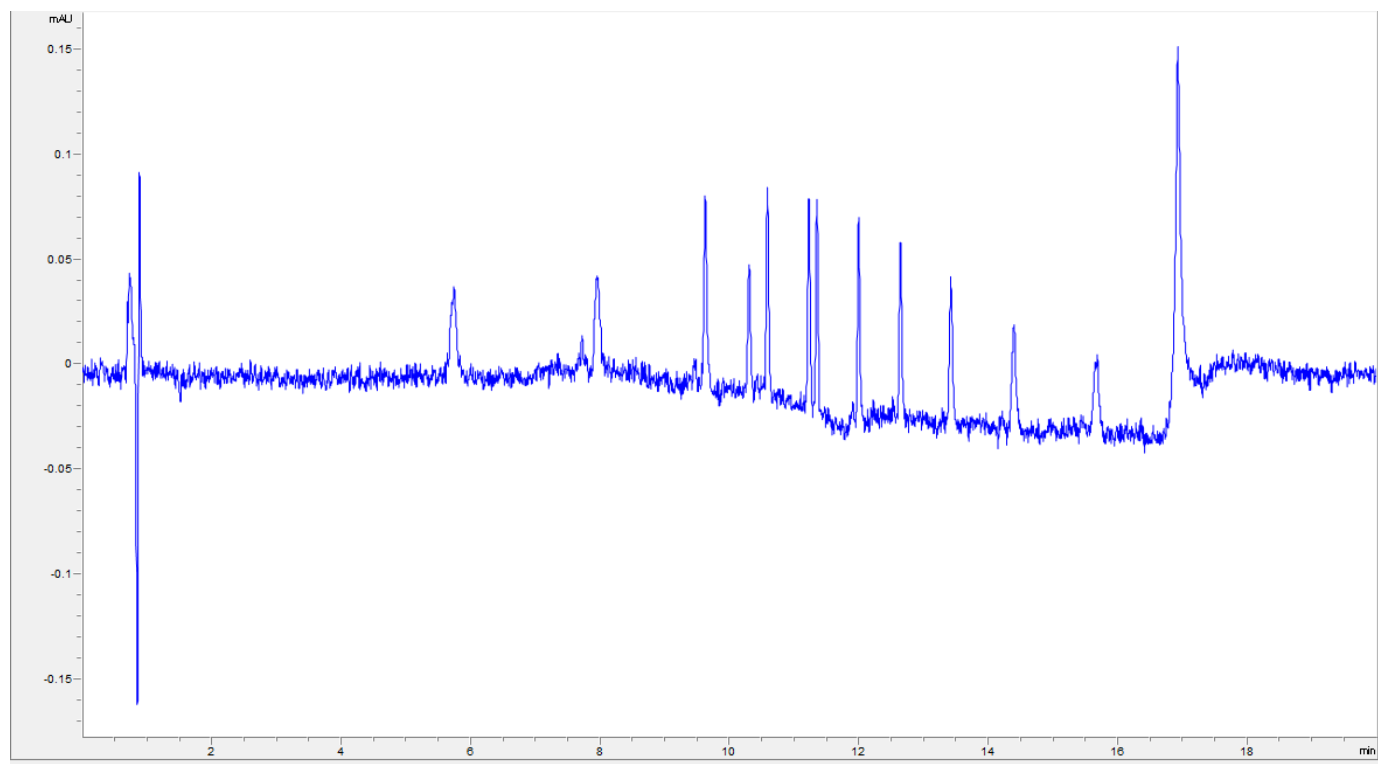

**Figure S3.** LC-UV/DAD chromatogram obtained by injecting 5  $\mu\text{L}$  of aldehydes-DNPH standard solution at 25  $\mu\text{g L}^{-1}$ . Peaks identification: Fo-DNPH (5.83 min), Ace-DNPH (8.05 min), Pro-DNPH (9.68 min), Cro-DNPH (10.36 min), Bu-DNPH (10.65 min), Cy-DNPH (11.29 min), Val-DNPH (11.40 min), Hex-DNPH (12.06 min), Hep-DNPH (12.73 min), Oct-DNPH (13.53 min), Non-DNPH (14.53 min), Dec-DNPH (15.85 min).

#### S4. LC-MS/MS and LC-UV/DAD chromatograms of PL5-doc

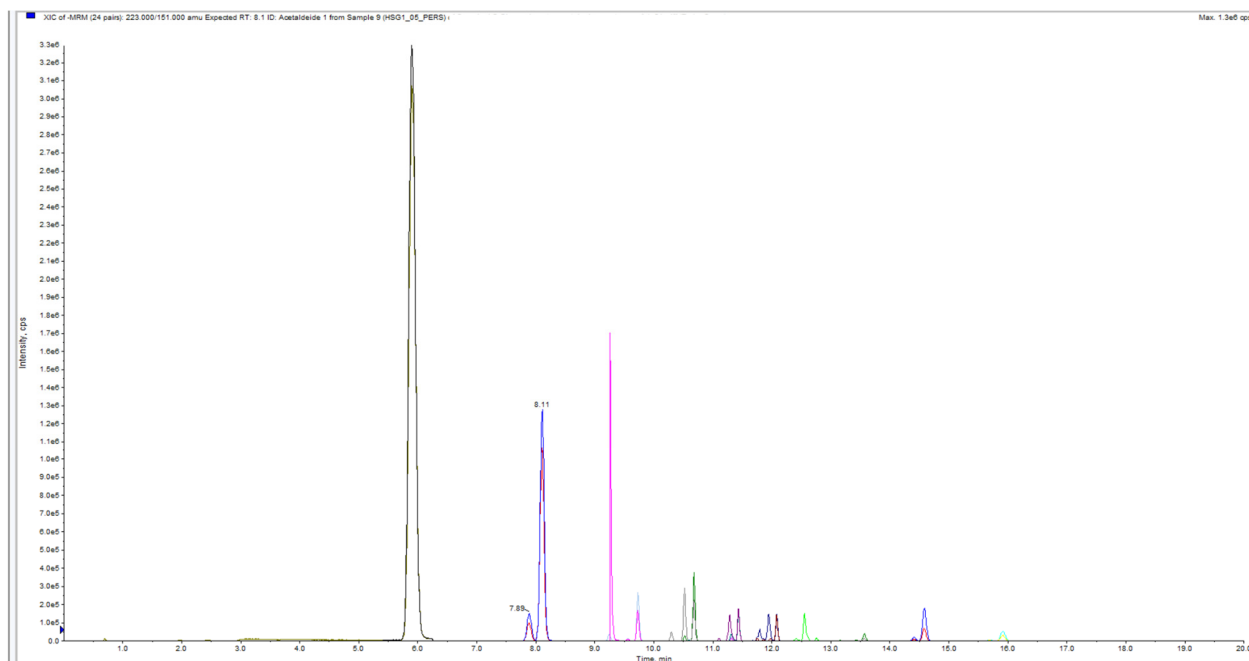

**Figure S4-1.** LC-MS/MS chromatogram obtained by injecting 5  $\mu$ L of the extracted sample PL5-doc.

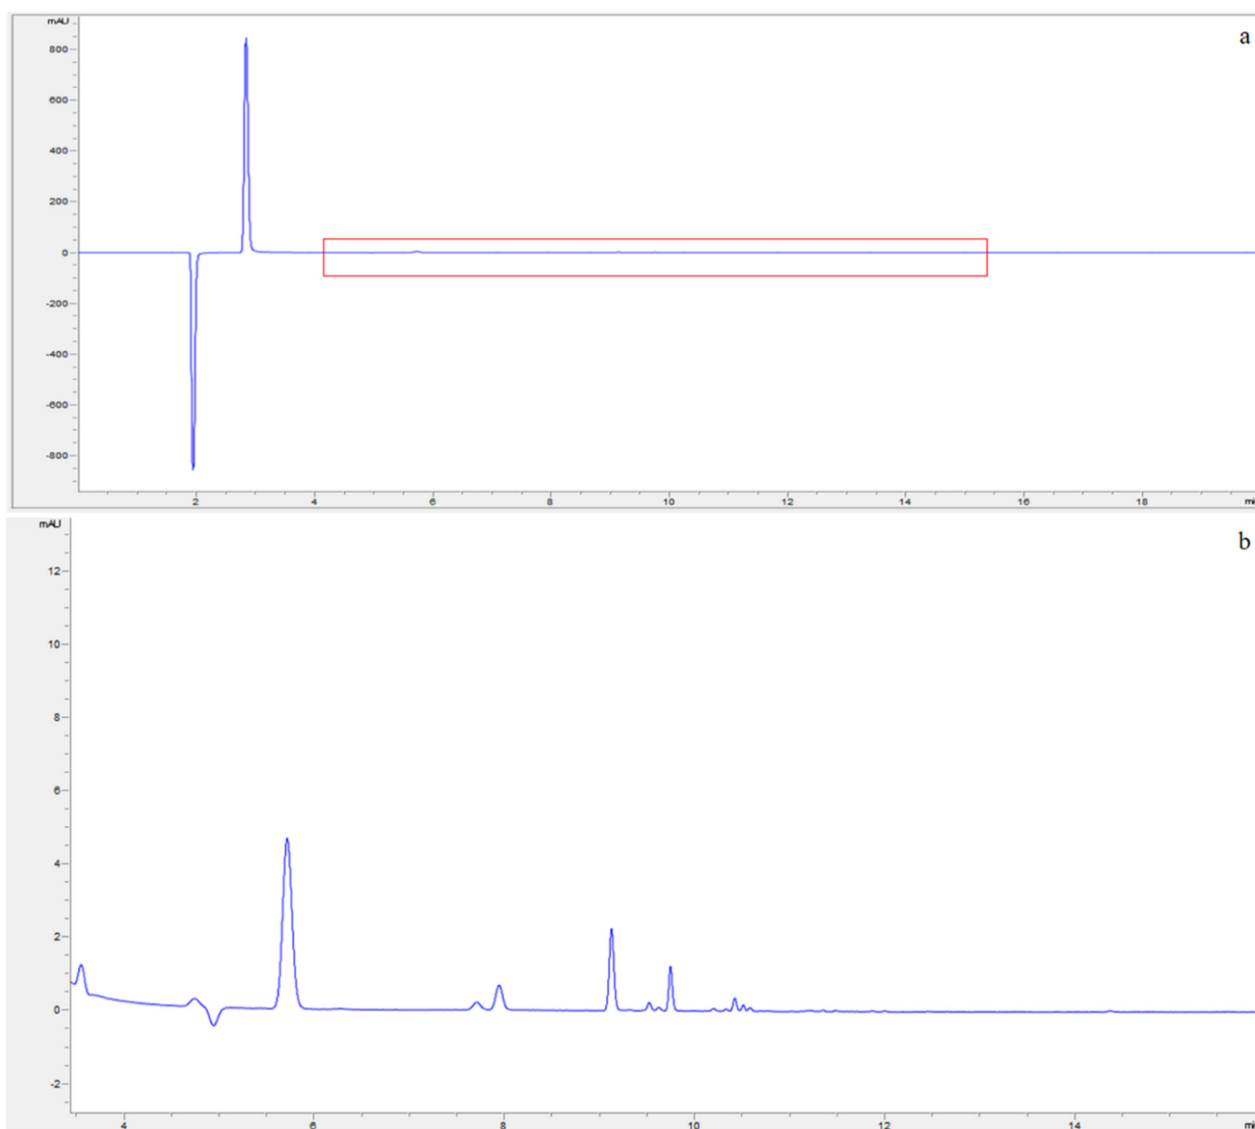

**Figure S4-2.** LC-UV/DAD chromatogram obtained by injecting 5  $\mu$ L of the extracted sample PL5-doc. The Figure S4-2a represent the total chromatogram. The figure S4-2b is an enlargement of figure S4-2a.

## S5. LC-MS/MS and LC-UV/DAD chromatograms of BS1-hair

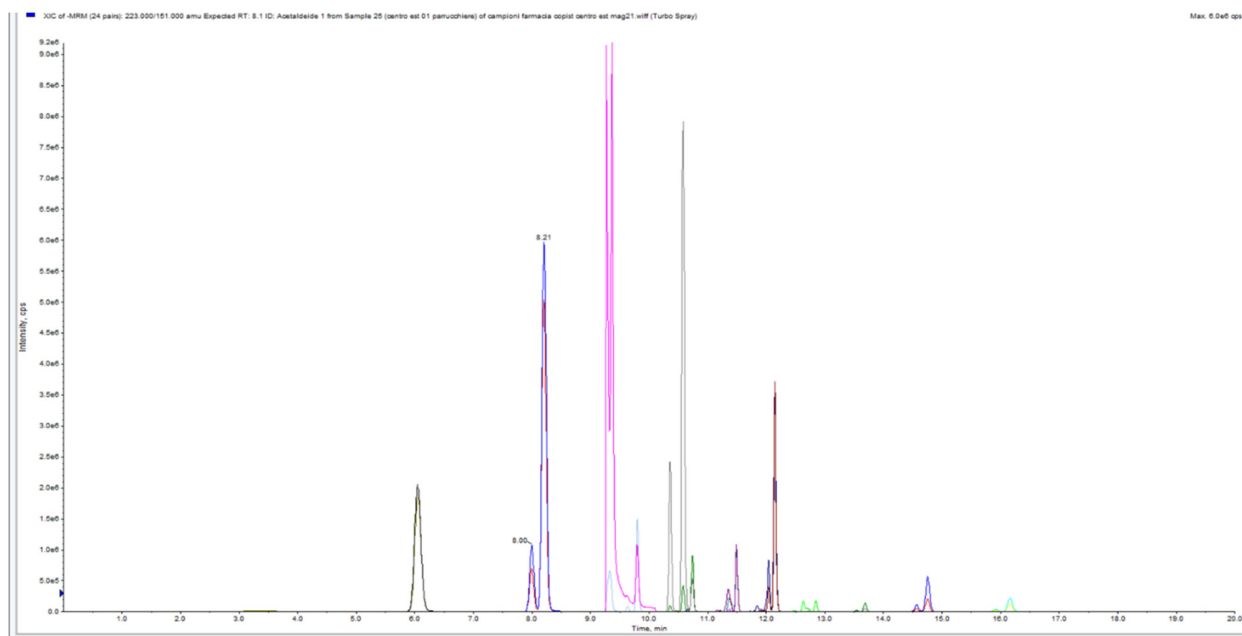

**Figure S5-1.** LC-MS/MS chromatogram obtained by injecting 5  $\mu$ L of the extracted sample BS1-hair.

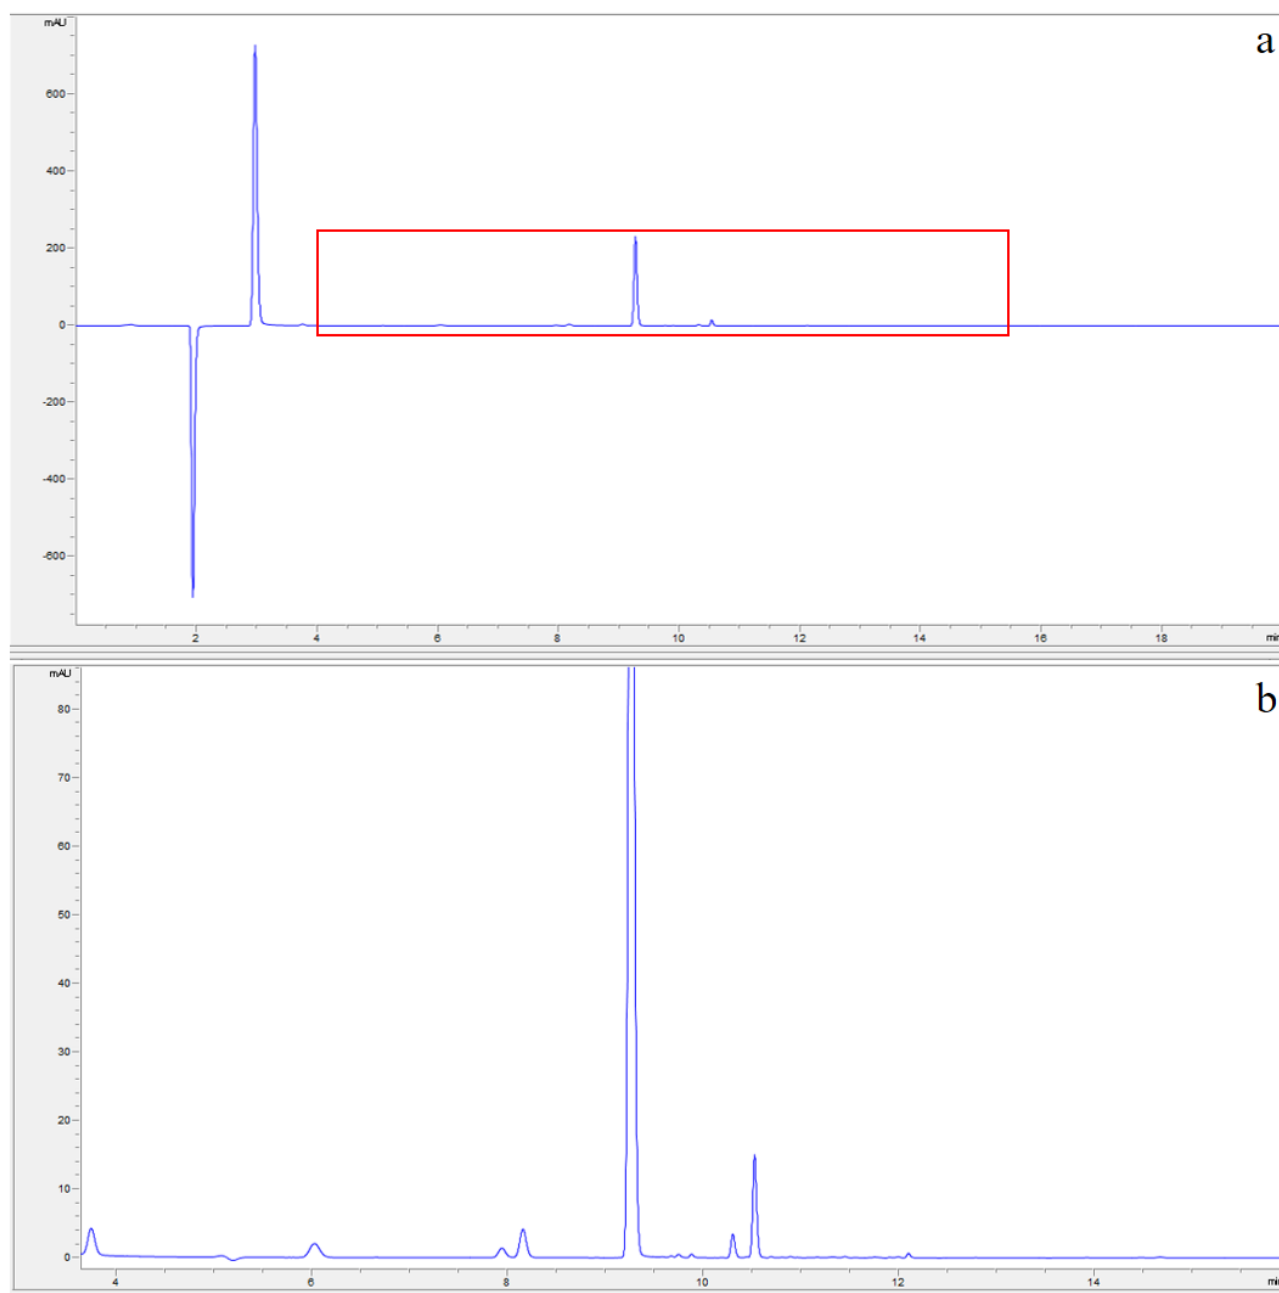

**Figure S5-2.** LC-UV/DAD chromatogram obtained by injecting 5  $\mu$ L of the extracted sample BS1-hair. The Figure S5-2a represent the total chromatogram. The figure S5-2b is an enlargement of figure S5-2a.

## S6. LC-MS/MS and LC-UV/DAD chromatograms of ParL4-lab

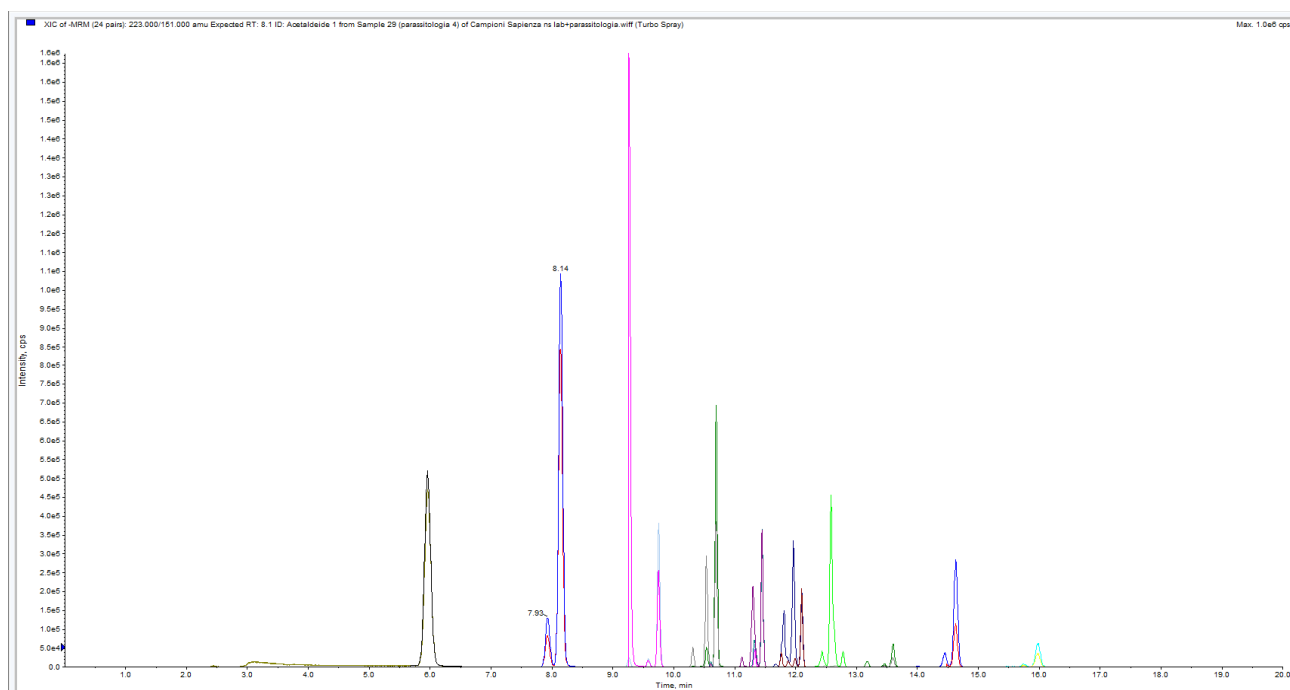

**Figure S6-1.** LC-MS/MS chromatogram obtained by injecting 5  $\mu$ L of the extracted sample ParL4-lab.

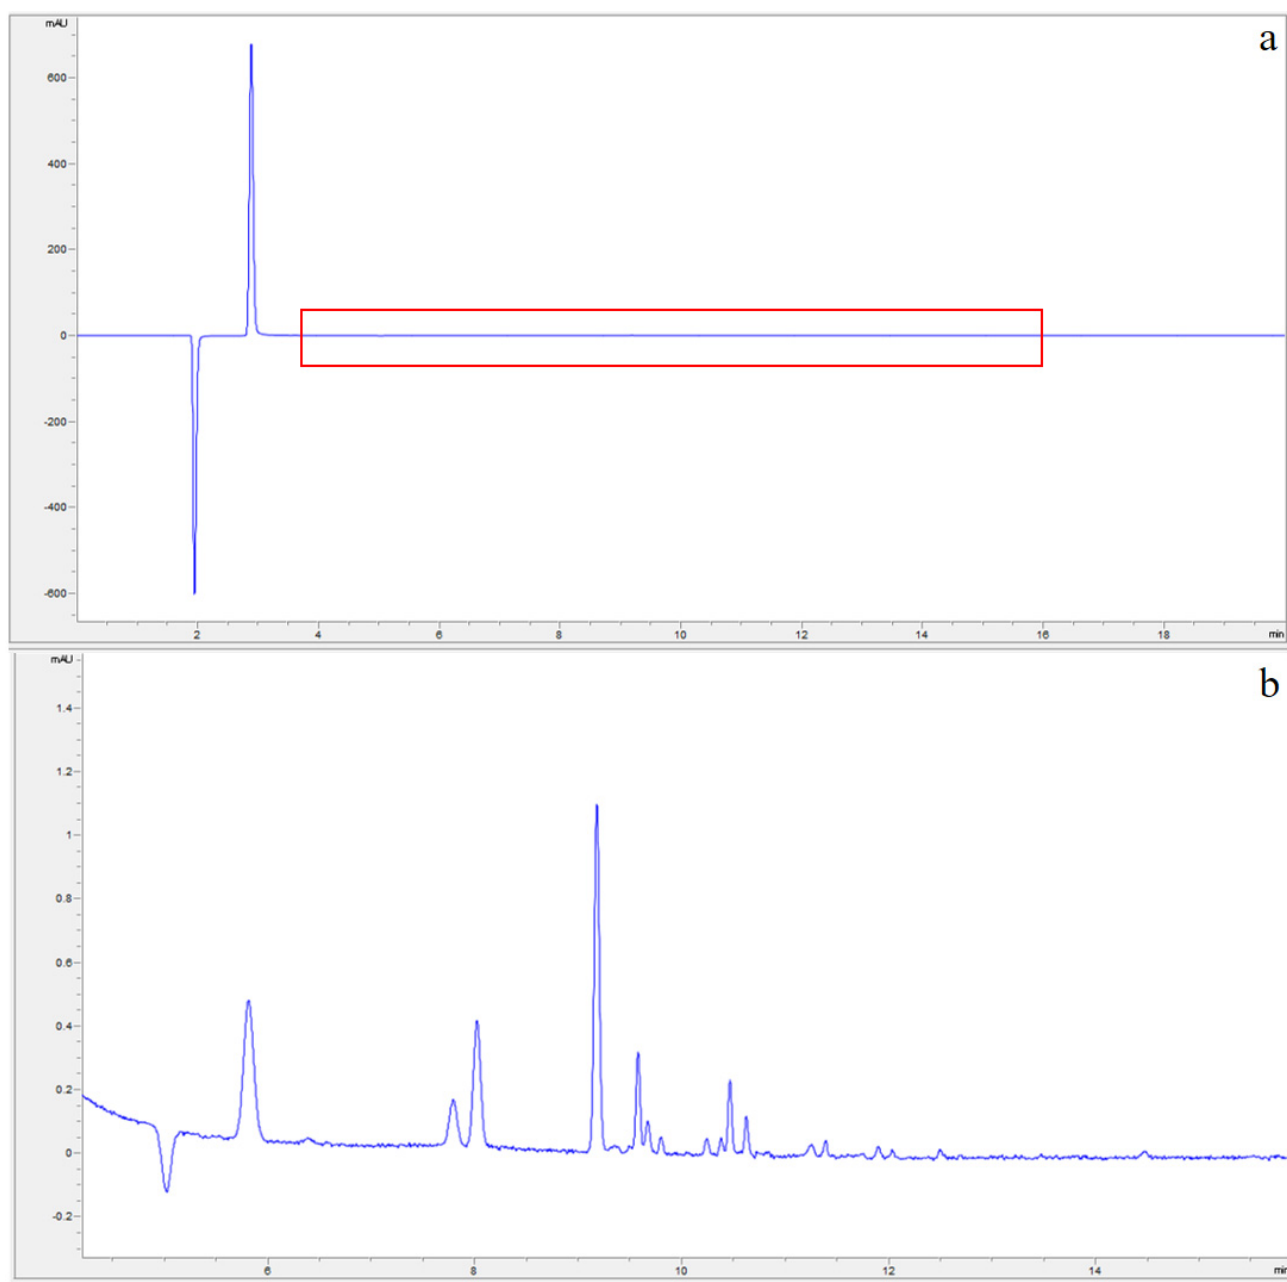

**Figure S6-2.** LC-UV/DAD chromatogram obtained by injecting 5  $\mu$ L of the extracted sample ParL4-lab. The Figure S6-2a represent the total chromatogram. The figure S6-2b is an enlargement of figure S6-2a.

## S7. Aldehyde concentrations in blank samples

**Table S7.** Average concentration ( $\mu\text{g L}^{-1}$ ), standard deviation (SD) and relative standard deviation (RSD%) obtained from the analysis of blank cartridges ( $n = 5$ ) using both LC-MS/MS and LC-UV/DAD detection methods.

|                 | LC-MS/MS              |     |      | LC-UV/DAD             |      |      |
|-----------------|-----------------------|-----|------|-----------------------|------|------|
|                 | Average concentration | SD  | RSD% | Average concentration | SD   | RSD% |
| <b>Fo-DNPH</b>  | 173.7                 | 2.5 | 1    | 150.1                 | 10.9 | 7    |
| <b>Ace-DNPH</b> | 191.4                 | 4.9 | 3    | 149.5                 | 4.9  | 3    |
| <b>Pro-DNPH</b> | 17.0                  | 0.5 | 3    | < LOQ                 |      |      |
| <b>Cro-DNPH</b> | < LOQ                 |     |      | < LOQ                 |      |      |
| <b>Bu-DNPH</b>  | 15.8                  | 0.5 | 3    | < LOQ                 |      |      |
| <b>Cy-DNPH</b>  | 3.4                   | 0.2 | 5    | nd                    |      |      |
| <b>Val-DNPH</b> | 12.3                  | 0.6 | 5    | < LOQ                 |      |      |
| <b>Hex-DNPH</b> | 13.0                  | 0.7 | 6    | < LOQ                 |      |      |
| <b>Hep-DNPH</b> | 1.7                   | 0.3 | 18   | nd                    |      |      |
| <b>Oct-DNPH</b> | 3.5                   | 0.2 | 5    | nd                    |      |      |
| <b>Non-DNPH</b> | 24.1                  | 1.4 | 6    | < LOQ                 |      |      |
| <b>Dec-DNPH</b> | 6.5                   | 0.3 | 5    | nd                    |      |      |
